# Supplementary material
Source: PubMed Central journal article supplement (PMC5568483)
Supplement: NIHMS888124-supplement-1.pdf [file NIHMS888124-supplement-1.pdf]

Supplementary Table 1. Oligos used for Real-time qPCR detection in this study

| Species         | Gene         | 5' - 3' Forward primer    | 5' - 3' Reverse primer      | Citation                               |
|-----------------|--------------|---------------------------|-----------------------------|----------------------------------------|
| Human           | <i>ARG1</i>  | TGGACAGACTAGGAAT<br>TGGCA | CCAGTCCGTCAACATCAA<br>AACT  | (Primer<br>Bank ID<br>3469864<br>33c3) |
| mouse and human | <i>GAPDH</i> | AGGTCGGTGTGAACGG<br>ATTTG | TGTAGACCATGTAGTTGA<br>GGTCA | (1)                                    |
| mouse           | <i>Arg1</i>  | CATGGGCAACCTGTGT<br>CCTT  | TCCTGGTACATCTGGGAAC<br>TTTC | (2)                                    |
| mouse           | <i>Nos2</i>  | GACGAGACGGATAGGC<br>AGAG  | GTGGGGTTGTTGCTGAACT<br>T    | (3)                                    |
| mouse           | <i>Il6</i>   | CCGGAGAGGAGACTTC<br>ACAG  | TCCACGATTTCCAGAGA<br>AC     | (4)                                    |

## References

1. Cool, J., T. J. DeFalco, and B. Capel. 2011. Vascular-mesenchymal cross-talk through Vegf and Pdgf drives organ patterning. *Proc Natl Acad Sci U S A* 108: 167-172.
2. Tighe, R. M., E. N. Potts, F. Feng, Z. Li, B. Frush, Y. W. He, D. B. Corry, P. W. Noble, and J. W. Hollingsworth. 2011. Extracellular Matrix Protein Mindin is Required for the Complete Allergic Response to Fungal-Associated Proteinase. *J Allergy Ther* 2011.
3. Pollpeter, D., A. Komuro, G. N. Barber, and C. M. Horvath. 2011. Impaired cellular responses to cytosolic DNA or infection with *Listeria monocytogenes* and vaccinia virus in the absence of the murine LGP2 protein. *PLoS one* 6: e18842.
4. Shi, Y., P. Rupa, B. Jiang, and Y. Mine. 2014. Hydrolysate from eggshell membrane ameliorates intestinal inflammation in mice. *Int J Mol Sci* 15: 22728-22742.

Figure S1

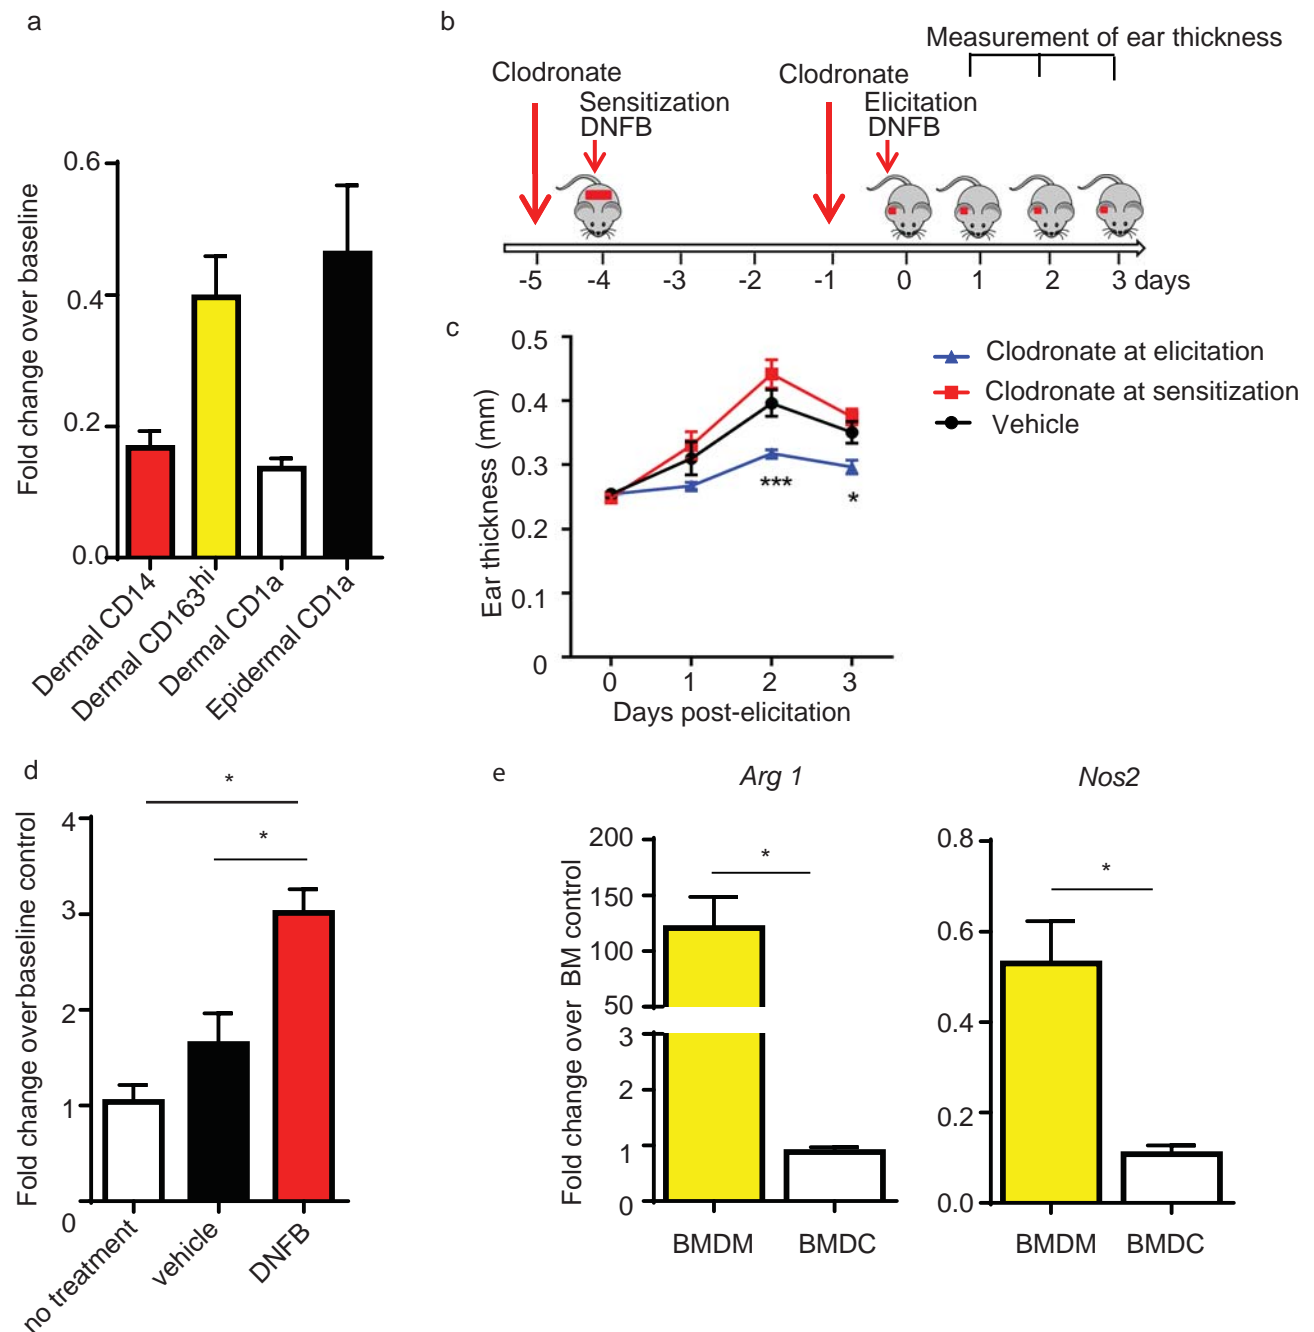

**Supplemental Figure S1. Arg1 expression in myeloid cell subsets and in allergic contact hypersensitivity responses**

(a) Real-time qPCR analysis of Arg1 mRNA expression in epidermal CD1a<sup>+</sup> and dermal CD14<sup>+</sup>, CD163<sup>+</sup>, and CD1a<sup>+</sup> sorted cells of the skin from healthy human subjects. Data are presented as mean ± SEM from triplicate measurement and are representative of 2 samples.

(b,c) MΦ were depleted using clodronate at 24 hrs prior to sensitization or elicitation with DNFB. Mice treated with empty liposome were served as control. Ear swelling was measured and is depicted as mean ± SEM from 4-6 mice per tested condition, \*p<0.05.

(d) Real-time qPCR analysis for Arg1 mRNA expression on murine FACS-sorted CD45<sup>+</sup>CD3<sup>-</sup>CD11b<sup>+</sup>F4/80<sup>+</sup>Gr1<sup>-</sup> cells 24 hrs *in vivo* after DNFB elicitation. Data are presented as mean ± SEM from triplicate measurement, pooled from 4-5 mice, \*p<0.05,

(e) Real-time qPCR analysis of Arg1 and Nos2 mRNA expression on BM-derived macrophages (BMDM, M-CFS 10 ng/ml for six days) and BM-derived dendritic cells (BMDC, GM-CFS 5 ng/ml for six days). Data are summarized as mean ± SEM, \*p<0.05, representative of 3 independent experiments.

Figure S2

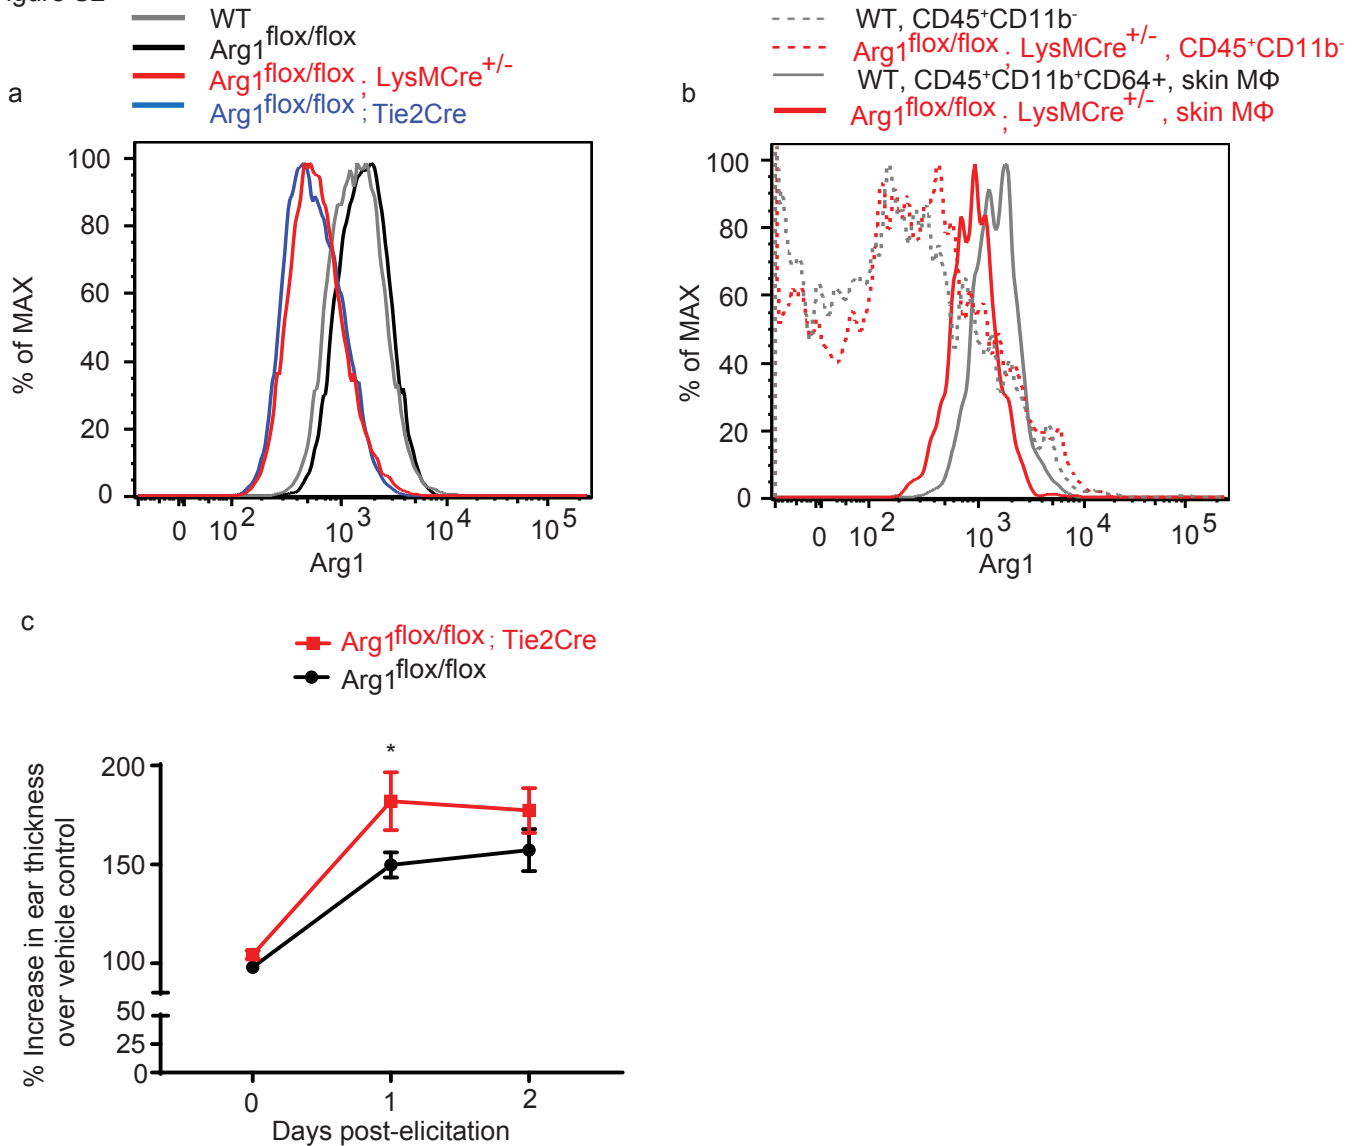

**Supplemental Figure S2. Arg1 deletion in mono/MΦ**

(a) Flow cytometry histogram of Arg1<sup>flox/flox</sup>; Tie2Cre; Arg1<sup>flox/flox</sup>; LysMCre; Arg1<sup>flox/flox</sup>, and WT BMDM. Gated on CD45<sup>+</sup>F4/80<sup>+</sup>CD11b<sup>+</sup> cells.

(b) Flow cytometry histogram on skin MΦ being CD45<sup>+</sup>CD3<sup>-</sup>Ly6G<sup>-</sup>CD161<sup>-</sup>B220<sup>-</sup>CD64<sup>+</sup>CD11b<sup>+</sup> and CD45<sup>+</sup>CD11b<sup>-</sup> cells in Arg1<sup>flox/flox</sup>; LysMCre<sup>+/-</sup> and WT mice

(c) Arg1<sup>flox/flox</sup>; Tie2Cre and Arg1<sup>flox/flox</sup> were sensitized and elicited with DNFB. Ear swelling was measured daily and is depicted as mean ± SEM from 15-22 mice, \*p<0.05

Figure S3

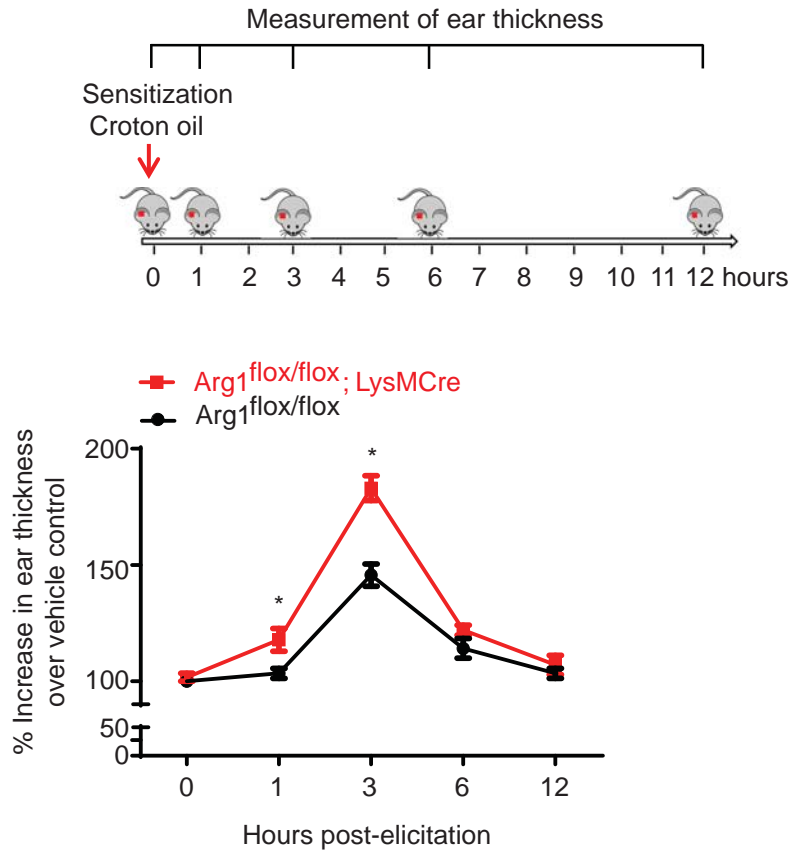

**Supplemental Figure S3.  $Arg1$  deletion in mono/ $M\Phi$  increases ICD in vivo**

$Arg1^{flox/flox}; LysMCre^{+/-}$  and  $Arg1^{flox/flox};$  mice were treated with the irritant croton oil. Ear swelling is depicted as mean  $\pm$  SEM from 6 mice per group, \* $p < 0.05$ .
